# Supplementary material
Source: Springer Nature journal article supplement (https://www.springermedizin.de/resource/supplementary/13058_2013_3419_MOESM9_ESM.pdf/9704106)

**A****HMECs sorted by ALDEFLUOR and immunostained for ALDH1A1 and ALDH1A3**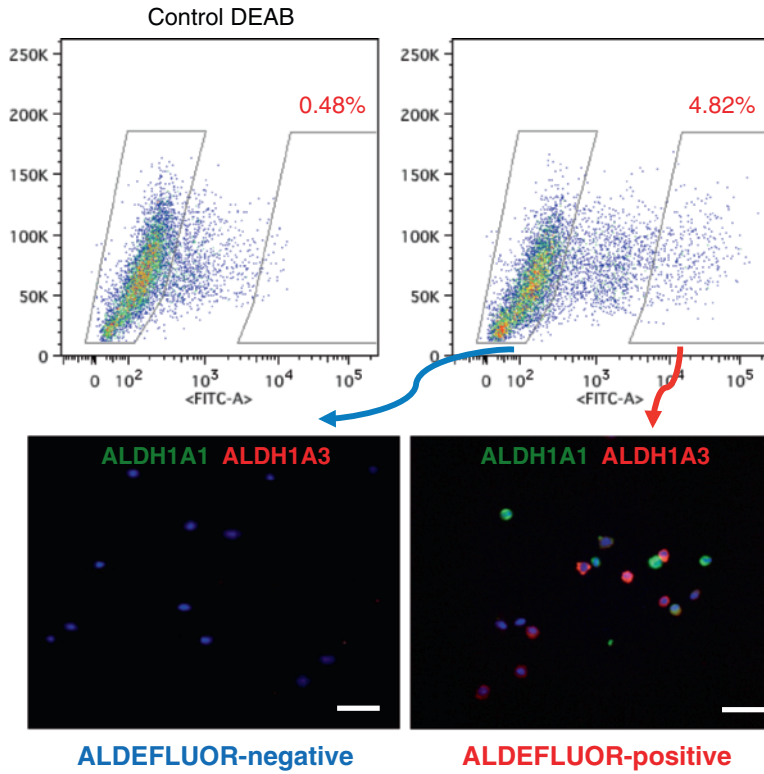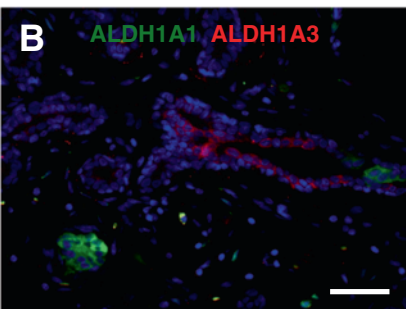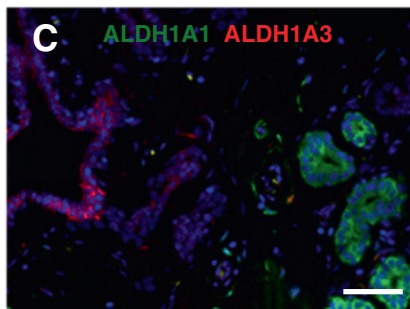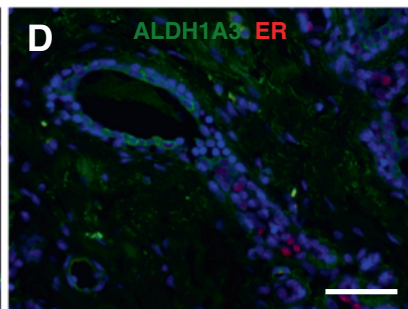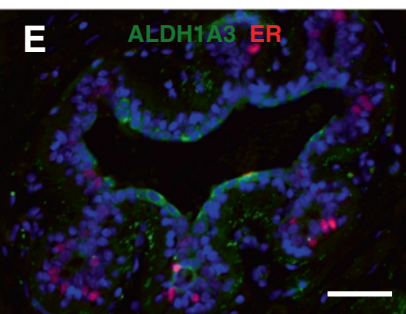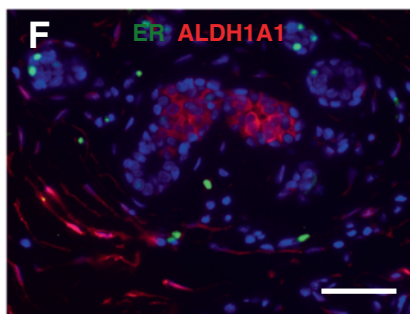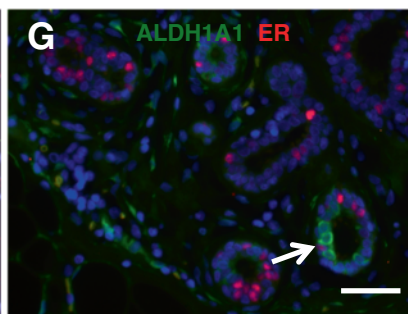

Supplement: MOESM9 [file 9704106]
